# Supplementary material
Source: ML conference proceedings conference paper supplement (https://openaccess.thecvf.com/content/WACV2023/html/Yamashita_nLMVS-Net_Deep_Non-Lambertian_WACV_2023_paper.html)
Supplement: Supplementary file 1 [file Yamashita_nLMVS-Net_Deep_Non-Lambertian_WACV_2023_supplemental.zip]

Archive with 2 entries (2 files):
- 0384-supp.mp4
- 0384-supp.pdf
